# Supplementary material
Source: publisher site journal article supplement (https://www.dovepress.com/article/300783)
Supplement: Supplementary file 1 [file get_supplementary_file.php]

**Table S1.** Primers for QPCR

| Gene symbol | forward primer (5’-3’) | reverse primer (5’-3’) |
| --- | --- | --- |
| *BRCA2* | CACCCACCCTTAGTTCTACTGT | CCAATGTGGTCTTTGCAGCTAT |
| *GAPDH* | GGAGCGAGATCCCTCCAAAAT | GGCTGTTGTCATACTTCTCATGG |
| U6 | TGCTCGCTTCGGCAGCACAT | CTTGCGCAGGGGCCATGCTA |
| has-miR-1178-3p | CGCGCTTGCTCACTGTTCTTCCCTAG |  |

**Table S2.** Candidate HR and NHEJ DSBR genes associated with PTC risk and

the score predicted by Genecards

| Gene symbol | Description | Score |
| --- | --- | --- |
| Homologous recombination | | |
| *RAD51* | RAD51 Recombinase | 44.34 |
| *BRCA2* | BRCA2, DNA Repair Associated | 27.41 |
| *MRE11* | MRE11 Homolog, Double Strand Break Repair Nuclease | 27.07 |
| *BRCA1* | BRCA1, DNA Repair Associated | 25.8 |
| *PTEN* | Phosphatase And Tensin Homolog | 24.03 |
| *RAD52* | RAD52 Homolog, DNA Repair Protein | 23.33 |
| *DMC1* | DNA Meiotic Recombinase 1 | 22.16 |
| *RAD50* | RAD50 Double Strand Break Repair Protein | 21.76 |
| *ATM* | ATM Serine/Threonine Kinase | 21.3 |
| *RAG1* | Recombination Activating 1 | 21.01 |
| *XRCC2* | X-Ray Repair Cross Complementing 2 | 21 |
| *RAD51C* | RAD51 Paralog C | 20.96 |
| *RAD51B* | RAD51 Paralog B | 20.7 |
| Non-homologous end joining | | |
| *XRCC4* | X-Ray Repair Cross Complementing 4 | 38.01 |
| *LIG4* | DNA Ligase 4 | 35.89 |
| *NHEJ1* | Non-Homologous End Joining Factor 1 | 35.21 |
| *XRCC5* | X-Ray Repair Cross Complementing 5 | 33.54 |
| *PRKDC* | Protein Kinase, DNA-Activated, Catalytic Polypeptide | 32.5 |
| *XRCC6* | X-Ray Repair Cross Complementing 6 | 31.69 |
| *DCLRE1C* | DNA Cross-Link Repair 1C | 22.31 |

**Table S3.** Polymorphisms included in the study and their minor allele frequency

| Gene symbol | SNPs | Variation | Global MAF | MAF (CHB) |
| --- | --- | --- | --- | --- |
| *RAD51* | rs11852786 | C/G | G=0.378 | G=0.393 |
| *RAD51B* | rs963917 | A/G | A=0.297 | G=0.447 |
| *BRCA1* | rs12516 | G/A | A=0.342 | A=0.350 |
| *BRCA1* | rs8176318 | C/A | A=0.325 | A=0.350 |
| *BRCA2* | rs15869 | A/C | C=0.162 | C=0.252 |
| *XRCC4* | rs2035990 | T/C | C=0.189 | C=0.450 |
| *XRCC5* | rs2440 | A/G | A=0.420 | G=0.282 |

**Table S4.** Characteristics of study subjects

| Group | Cases (%) | Control (%) | *P* |
| --- | --- | --- | --- |
| gender |  |  |  |
| male | 37 (18.0) | 37 (18.0) | 1.000 |
| female | 169(82.0) | 169(82.0) | |
| age (year) |  |  |  |
| <50 | 119(57.8) | 131(63.6) | 0.267 |
| ≥50 | 87 (42.2) | 75(36.4) | |
| smoking |  |  |  |
| yes | 30 (14.6) | 11 (5.3) | 0.003 |
| no | 176(85.4) | 195(94.7) | |
| drinking |  |  |  |
| yes | 83 (40.3) | 84 (40.8) | 1.000 |
| no | 123(59.7) | 122 (59.2) | |

**Table S5.** Hardy-Weinberg analysis of the candidate SNPs

| SNP | Controls N (%) | χ2 | *P* |
| --- | --- | --- | --- |
| *RAD51* rs11852786 | |  |  |
| CC | 147(71.4) | 0.148 | 0.7 |
| CG | 54(26.2) |  |  |
| GG | 5(2.4) |  |  |
| *RAD51B* rs963917 | |  |  |
| AA | 59(28.6) | 0.049 | 0.824 |
| AG | 101(49.0) |  |  |
| GG | 46(45.2) |  |  |
| *BRCA1* rs12516 | |  |  |
| GG | 97(47.1) | 0.142 | 0.706 |
| AG | 87(42.2) |  |  |
| AA | 22(10.7) |  |  |
| *BRCA1* rs8176318 | |  |  |
| CC | 104(50.5) | 1.223 | 0.269 |
| AC | 80(38.9) |  |  |
| AA | 22(10.7) |  |  |
| *BRCA2* rs15869 | |  |  |
| AA | 118(57.3) | 1.541 | 0.215 |
| AC | 80(38.9) |  |  |
| CC | 8(3.9) |  |  |
| *XRCC4* rs2035990 | |  |  |
| CC | 54(26.2) | 0.076 | 0.783 |
| CT | 101(49.0) |  |  |
| TT | 51(24.8) |  |  |
| *XRCC5* rs2440 | |  |  |
| AA | 107(51.9) | 0.513 | 0.474 |
| AG | 80(38.9) |  |  |
| GG | 19(9.2) |  |  |

**Table S6.** Experiment-supported evidence curated by HMDD database for hsa-miR-1178-3p and disease associations.

| miRNA name | Evidence Code | Disease name | PMID | Causality |
| --- | --- | --- | --- | --- |
| hsa-miR-1178-3p | target gene | Pancreatic Neoplasms | 25635996 | YES |
| hsa-miR-1178-3p | target gene | Tuberculosis | 29781535 | YES |
| hsa-miR-1178-3p | tissue_expression_up † | Carcinoma, Pancreatic | 28592083 | NO |

†: compared with the normal pancreatic tissues, the expression of hsa-miR-1178-3p was up-regulated.
